# Supplementary material
Source: PubMed Central journal article supplement (PMC2148278)

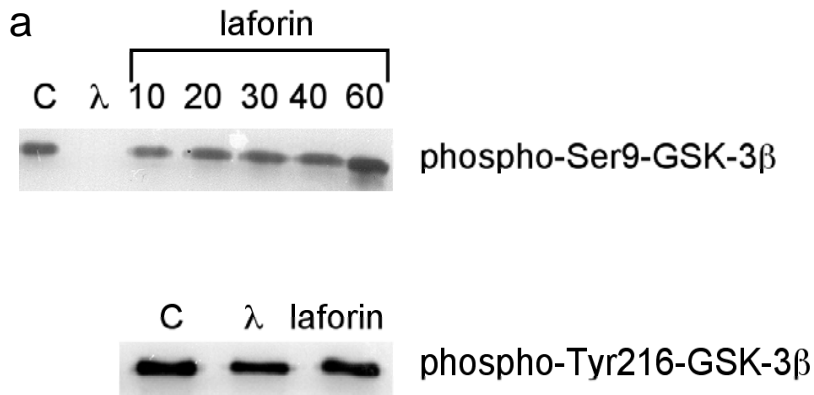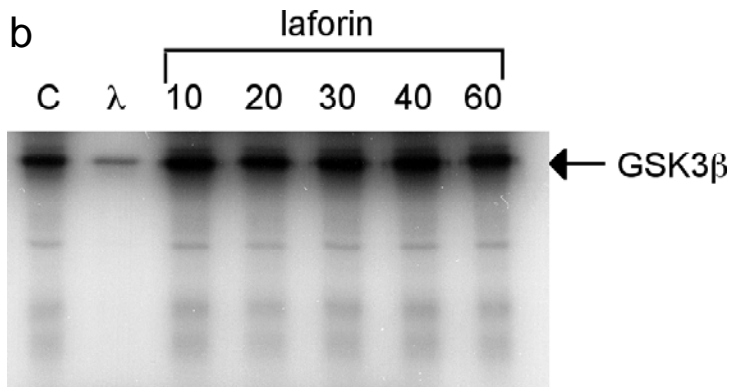

Supplement: pnas_0707952104_1.pdf [file pnas_0707952104_1.pdf]
